# Supplementary material for: Leisure-time sedentary behaviors are differentially associated with all-cause dementia regardless of engagement in physical activity
Source: PubMed Central journal article supplement — Proc Natl Acad Sci U S A. 2022 Aug 22;119(35):e2206931119. doi: 10.1073/pnas.2206931119 (PMC9436362; doi:10.1073/pnas.2206931119), 2022-08-22
Supplement: pnas.2206931119.sapp.pdf [file pnas.2206931119.sapp.pdf]

Supporting Information

Table S1. Sensitivity analyses for association between PA, SBs, and incident dementia

| Sensitivity analysis          | Variable         | HR   | lower | upper | p value |
|-------------------------------|------------------|------|-------|-------|---------|
| Exclude <5 years <sup>a</sup> | PA               | 0.97 | 0.94  | 1.00  | 5.4E-02 |
|                               | TV               | 1.24 | 1.15  | 1.33  | 6.2E-09 |
|                               | Computer         | 0.85 | 0.80  | 0.90  | 2.9E-08 |
|                               | PA lowest        | 1.00 |       |       |         |
|                               | PA medium        | 0.94 | 0.86  | 1.02  | 1.3E-01 |
|                               | PA highest       | 0.89 | 0.82  | 0.97  | 1.1E-02 |
|                               | TV lowest        | 1.00 |       |       |         |
|                               | TV medium        | 1.05 | 0.96  | 1.15  | 2.8E-01 |
|                               | TV highest       | 1.22 | 1.12  | 1.34  | 1.4E-05 |
|                               | Computer lowest  | 1.00 |       |       |         |
|                               | Computer medium  | 0.70 | 0.64  | 0.77  | 2.2E-14 |
|                               | Computer highest | 0.76 | 0.70  | 0.83  | 6.0E-10 |
| Include all ages <sup>b</sup> | PA               | 0.95 | 0.93  | 0.98  | 7.0E-04 |
|                               | TV               | 1.27 | 1.19  | 1.35  | 2.2E-13 |
|                               | Computer         | 0.87 | 0.82  | 0.91  | 2.9E-08 |
|                               | PA lowest        | 1.00 |       |       |         |
|                               | PA medium        | 0.91 | 0.84  | 0.98  | 1.7E-02 |
|                               | PA highest       | 0.85 | 0.79  | 0.92  | 4.3E-05 |
|                               | TV lowest        | 1.00 |       |       |         |
|                               | TV medium        | 1.12 | 1.03  | 1.22  | 1.2E-02 |
|                               | TV highest       | 1.27 | 1.17  | 1.39  | 2.2E-08 |
|                               | Computer lowest  | 1.00 |       |       |         |
|                               | Computer medium  | 0.73 | 0.67  | 0.79  | 3.0E-14 |
|                               | Computer highest | 0.79 | 0.74  | 0.86  | 2.5E-09 |
| Imputed <sup>c</sup>          | PA               | 0.96 | 0.93  | 0.98  | 1.1E-03 |
|                               | TV               | 1.17 | 1.11  | 1.23  | 5.4E-09 |
|                               | Computer         | 0.84 | 0.80  | 0.88  | 3.8E-15 |
|                               | PA lowest        | 1.00 |       |       |         |
|                               | PA medium        | 0.92 | 0.86  | 0.99  | 3.2E-02 |
|                               | PA highest       | 0.87 | 0.81  | 0.94  | 2.9E-04 |
|                               | TV lowest        | 1.00 |       |       |         |
|                               | TV medium        | 1.01 | 0.95  | 1.08  | 7.3E-01 |
|                               | TV highest       | 1.15 | 1.07  | 1.23  | 5.8E-05 |
|                               | Computer lowest  | 1.00 |       |       |         |
|                               | Computer medium  | 0.70 | 0.66  | 0.75  | 0.0E+00 |

|                              |                              |      |      |      |         |
|------------------------------|------------------------------|------|------|------|---------|
|                              | Computer highest             | 0.75 | 0.70 | 0.80 | 0.0E+00 |
| Competing risks <sup>d</sup> | PA                           | 1.00 | 1.00 | 1.00 | 3.1E-02 |
|                              | TV                           | 1.23 | 1.14 | 1.32 | 3.7E-08 |
|                              | Computer                     | 0.85 | 0.80 | 0.90 | 1.1E-07 |
|                              | PA lowest                    | 1.00 |      |      |         |
|                              | PA medium                    | 0.94 | 0.86 | 1.02 | 1.1E-01 |
|                              | PA highest                   | 0.89 | 0.82 | 0.96 | 3.5E-03 |
|                              | TV lowest                    | 1.00 |      |      |         |
|                              | TV medium                    | 1.04 | 0.95 | 1.13 | 4.1E-01 |
|                              | TV highest                   | 1.20 | 1.10 | 1.31 | 3.2E-05 |
|                              | Computer lowest              | 1.00 |      |      |         |
|                              | Computer medium              | 0.70 | 0.64 | 0.76 | 2.2E-16 |
|                              | Computer highest             | 0.76 | 0.70 | 0.82 | 9.5E-11 |
|                              | Employment type <sup>e</sup> | PA   | 0.95 | 0.90 | 1.00    |
| TV                           |                              | 1.30 | 1.15 | 1.48 | 4.9E-05 |
| Computer                     |                              | 0.85 | 0.77 | 0.94 | 1.5E-03 |
| PA lowest                    |                              | 1.00 |      |      |         |
| PA medium                    |                              | 0.92 | 0.79 | 1.07 | 2.6E-01 |
| PA highest                   |                              | 0.77 | 0.66 | 0.90 | 8.0E-04 |
| TV lowest                    |                              | 1.00 |      |      |         |
| TV medium                    |                              | 1.06 | 0.91 | 1.23 | 4.8E-01 |
| TV highest                   |                              | 1.25 | 1.06 | 1.46 | 6.6E-03 |
| Computer lowest              |                              | 1.00 |      |      |         |
| Computer medium              |                              | 0.67 | 0.57 | 0.79 | 1.2E-06 |
| Computer highest             |                              | 0.68 | 0.58 | 0.79 | 1.2E-06 |

Note: results presented are Cox proportional hazards regression adjusted for age, sex, education, Townsend deprivation index, ethnicity, *APOE*  $\epsilon$ 4 genotype, alcohol consumption, smoking status, chronic disease, depression, healthy diet score, BMI, and sleep. <sup>a</sup>3,176 cases, 143,144 controls; <sup>b</sup>4,034 cases, 344,371 controls; <sup>c</sup>6,031 cases, 217,360 controls; <sup>d</sup>3,507 cases, 143,144 controls; <sup>e</sup>1,015 cases, 63,047 controls.
